# Supplementary material for: Early administration of epinephrine (adrenaline) in patients with cardiac arrest with initial shockable rhythm in hospital: propensity score matched analysis
Source: PubMed Central journal article supplement — BMJ. 2016 Apr 6;353:i1577. doi: 10.1136/bmj.i1577 (PMC4823528; doi:10.1136/bmj.i1577), 2016-04-06
Supplement: andl030630.ww1_default.pdf [file andl030630.ww1_default.pdf]

**Appendix 1: Characteristics of the Study Population in the Main Propensity Score Matched Cohort<sup>a</sup>**  
 [posted as supplied by author]

|                                           | Epinephrine<br>≤ 2 min<br>(n = 1489) | No epinephrine<br>≤ 2 min<br>(n = 1489) | p-value | Standardized<br>difference <sup>b</sup> |
|-------------------------------------------|--------------------------------------|-----------------------------------------|---------|-----------------------------------------|
| <b>Demographics</b>                       |                                      |                                         |         |                                         |
| Age – median years (quartiles)            | 65 (54, 76)                          | 66 (55, 76)                             | 0.45    | -0.028                                  |
| Sex (female) – no. (%)                    | 525 (35)                             | 537 (36)                                | 0.65    | -0.017                                  |
| Race – no. (%)                            |                                      |                                         | 0.92    |                                         |
| White                                     | 1116 (75)                            | 1122 (75)                               |         | -0.009                                  |
| Black                                     | 217 (15)                             | 212 (14)                                |         | 0.010                                   |
| Other                                     | 59 (4)                               | 64 (4)                                  |         | -0.017                                  |
| Unknown                                   | 97 (7)                               | 91 (6)                                  |         | 0.017                                   |
| <b>Type of Admission – no. (%)</b>        |                                      |                                         | 0.81    |                                         |
| Medical – non-cardiac                     | 388 (26)                             | 410 (28)                                |         | -0.033                                  |
| Medical – cardiac                         | 728 (49)                             | 711 (48)                                |         | 0.023                                   |
| Surgical – non-cardiac                    | 177 (12)                             | 178 (12)                                |         | -0.002                                  |
| Surgical – cardiac                        | 196 (13)                             | 190 (13)                                |         | 0.012                                   |
| <b>Pre-existing Conditions – no. (%)</b>  |                                      |                                         |         |                                         |
| <b>Cardiac</b>                            |                                      |                                         |         |                                         |
| History of MI                             | 320 (21)                             | 311 (21)                                | 0.69    | 0.015                                   |
| MI this admission                         | 429 (29)                             | 446(30)                                 | 0.47    | -0.025                                  |
| History of heart failure                  | 332 (22)                             | 336 (23)                                | 0.86    | -0.006                                  |
| Heart failure this admission              | 272 (18)                             | 262 (18)                                | 0.63    | 0.018                                   |
| <b>Non-Cardiac</b>                        |                                      |                                         |         |                                         |
| Respiratory insufficiency                 | 547 (37)                             | 557 (37)                                | 0.70    | -0.014                                  |
| Diabetes mellitus                         | 437 (29)                             | 455 (31)                                | 0.47    | -0.026                                  |
| Renal insufficiency                       | 424 (28)                             | 435 (29)                                | 0.64    | -0.016                                  |
| Metastatic/hematologic malignancy         | 128 (9)                              | 125 (8)                                 | 0.84    | 0.007                                   |
| Hypotension/hypoperfusion                 | 390 (26)                             | 391 (26)                                | 0.97    | -0.002                                  |
| Pneumonia                                 | 119 (8)                              | 121 (8)                                 | 0.89    | -0.005                                  |
| Baseline depression in CNS function       | 129 (9)                              | 145 (10)                                | 0.31    | -0.037                                  |
| Metabolic/electrolyte abnormality         | 203 (14)                             | 212 (14)                                | 0.63    | -0.018                                  |
| Septicemia                                | 184 (12)                             | 184 (12)                                | 1.00    | 0.000                                   |
| Acute CNS non-stroke event                | 79 (5)                               | 83 (6)                                  | 0.75    | -0.012                                  |
| Hepatic insufficiency                     | 97 (7)                               | 83 (6)                                  | 0.29    | 0.040                                   |
| Acute stroke                              | 60 (4)                               | 60 (4)                                  | 1.00    | 0.000                                   |
| Major trauma                              | 48 (3)                               | 46 (3)                                  | 0.82    | 0.008                                   |
| <b>Hospital Characteristics - no. (%)</b> |                                      |                                         |         |                                         |
| <b>Bed size</b>                           |                                      |                                         |         |                                         |
| 1 – 249                                   | 201 (14)                             | 205 (14)                                | 0.50    | -0.008                                  |
| 250 – 499                                 | 537 (36)                             | 564 (38)                                |         | -0.038                                  |
| 500+                                      | 751 (50)                             | 720 (48)                                |         | 0.042                                   |
| <b>Teaching Status</b>                    |                                      |                                         |         |                                         |
| Major                                     | 674 (45)                             | 668 (45)                                | 0.90    | 0.008                                   |

|                                                           |           |           |      |        |
|-----------------------------------------------------------|-----------|-----------|------|--------|
| Minor                                                     | 365 (25)  | 376 (25)  |      | -0.017 |
| Non-teaching                                              | 450 (30)  | 445 (30)  |      | 0.007  |
| <b>Ownership</b>                                          |           |           | 0.18 |        |
| Private                                                   | 237 (16)  | 251 (17)  |      | -0.025 |
| Government                                                | 130 (9)   | 108 (7)   |      | 0.055  |
| Non-Profit                                                | 1108 (74) | 1023 (75) |      | -0.023 |
| Military                                                  | 14 (1)    | 7 (0)     |      | 0.056  |
| <b>Location</b>                                           |           |           | 0.42 |        |
| Rural                                                     | 59 (4)    | 68 (5)    |      | -0.030 |
| Urban                                                     | 1430 (96) | 1421 (95) |      | 0.030  |
| <b>Geographical Location</b>                              |           |           | 0.59 |        |
| North-East                                                | 245 (16)  | 241 (16)  |      | 0.007  |
| South-East                                                | 369 (25)  | 356 (24)  |      | 0.020  |
| Mid-West                                                  | 339 (23)  | 378 (25)  |      | -0.061 |
| South-West                                                | 323 (22)  | 308 (21)  |      | 0.025  |
| West                                                      | 213 (14)  | 206 (14)  |      | 0.014  |
| <b>Year of the arrest – no. (%)</b>                       |           |           | 1.00 |        |
| 2006                                                      | 271 (18)  | 275 (18)  |      | -0.007 |
| 2007                                                      | 282 (19)  | 271 (18)  |      | 0.019  |
| 2008                                                      | 250 (17)  | 257 (17)  |      | -0.013 |
| 2009                                                      | 246 (17)  | 243 (16)  |      | 0.005  |
| 2010                                                      | 157 (11)  | 161 (11)  |      | -0.009 |
| 2011                                                      | 172 (12)  | 176 (12)  |      | -0.008 |
| 2012                                                      | 111 (7)   | 106 (7)   |      | 0.013  |
| <b>Interventions in place at time of arrest – no. (%)</b> |           |           |      |        |
| Mechanical ventilation                                    | 574 (39)  | 579 (39)  | 0.85 | -0.007 |
| ECG monitor                                               | 1369 (92) | 1363 (92) | 0.69 | 0.015  |
| Pulse oximeter                                            | 1178 (79) | 1171 (79) | 0.75 | 0.012  |
| Vasoactive agents                                         | 498 (33)  | 489 (33)  | 0.73 | 0.013  |
| Antiarrhythmic drugs                                      | 190 (13)  | 167 (11)  | 0.18 | 0.048  |
| <b>Arrest Characteristics – no. (%)</b>                   |           |           |      |        |
| <b>Location</b>                                           |           |           | 0.93 |        |
| Emergency department                                      | 152 (10)  | 159 (11)  |      | -0.015 |
| Floor with telemetry                                      | 208 (14)  | 214 (14)  |      | -0.012 |
| Floor without telemetry                                   | 116 (8)   | 120 (8)   |      | -0.010 |
| ICU                                                       | 821 (55)  | 812 (55)  |      | 0.012  |
| OR, PACU, or interventional area                          | 167 (11)  | 154 (10)  |      | 0.028  |
| Other                                                     | 25 (2)    | 32 (2)    |      | -0.025 |
| Time of day (night [11:00pm – 6:59am])                    | 423 (28)  | 404 (27)  | 0.44 | -0.025 |
| Weekend (Friday 11pm to Monday 7am)                       | 457 (31)  | 475 (32)  | 0.47 | -0.026 |
| Hospital wide cardiac arrest response activated           | 1025 (69) | 1047 (70) | 0.37 | -0.032 |
| Witnessed                                                 | 1333 (90) | 1314 (88) | 0.27 | 0.041  |
| <b>Initial rhythm</b>                                     |           |           | 0.56 |        |
| Pulseless VT                                              | 505 (34)  | 520 (35)  |      | -0.021 |

|                                           |           |           |      |        |
|-------------------------------------------|-----------|-----------|------|--------|
| VF                                        | 984 (66)  | 969 (65)  |      | 0.021  |
| Time to defibrillation from loss of pulse |           |           | 0.49 |        |
| 0 - 1 min                                 | 970 (65)  | 945 (63)  |      | 0.035  |
| 1 - 2 min                                 | 295 (20)  | 298 (20)  |      | -0.005 |
| 2 - 3 min                                 | 224 (15)  | 246 (17)  |      | -0.041 |
| Post-defibrillation rhythm                |           |           | 0.23 |        |
| Pulseless VT                              | 443 (30)  | 472 (32)  |      | -0.042 |
| VF                                        | 1046 (70) | 1017 (68) |      | 0.042  |
| Intubation 0 - 1 min after loss of pulse  | 91 (6)    | 68 (5)    | 0.05 | 0.042  |

<sup>a</sup> MI: myocardial infarction, CNS: central nervous system, ECG: electro cardiogram, OR: operating room, PACU: post-anesthesia care unit, VT: ventricular tachycardia, VF: ventricular fibrillation

<sup>b</sup> Standardized differences are calculated as the difference in means or proportions divided by the standard error
