# Supplementary material for: Early administration of epinephrine (adrenaline) in patients with cardiac arrest with initial shockable rhythm in hospital: propensity score matched analysis
Source: PubMed Central journal article supplement — BMJ. 2016 Apr 6;353:i1577. doi: 10.1136/bmj.i1577 (PMC4823528; doi:10.1136/bmj.i1577), 2016-04-06

**Appendix 2:** Distributions of propensity scores before and after matching [posted as supplied by author]

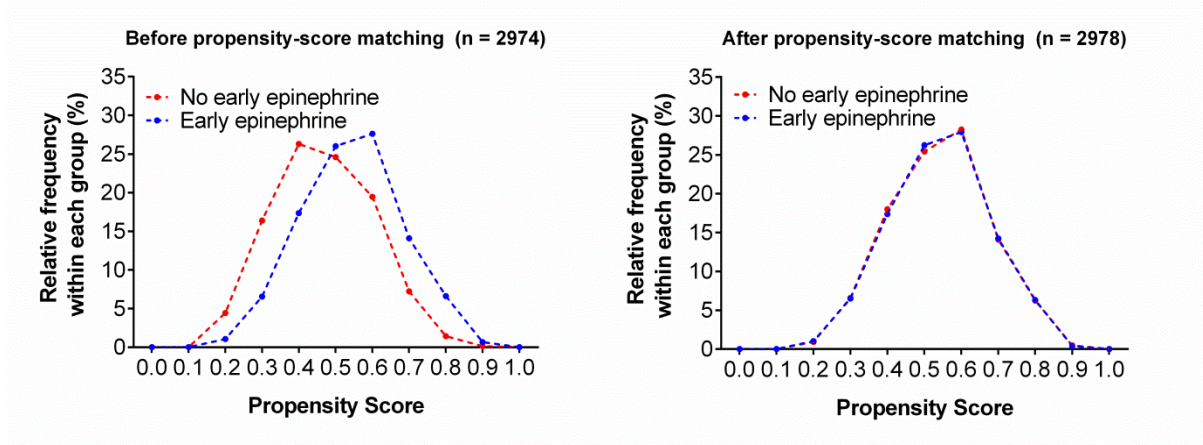

Supplement: andl030630.ww2_default.pdf [file andl030630.ww2_default.pdf]
